# Supplementary material
Source: MDPI journal article supplement (https://www.mdpi.com/2073-4352/6/12/162)
Supplement: s1 [file s1]

# Supplementary Materials: Crystal Structure of the Substrate-Binding Domain from *Listeria monocytogenes* Bile-Resistance Determinant Bile

Stephanie J. Ruiz, Gea K. Schuurman-Wolters and Bert Poolman

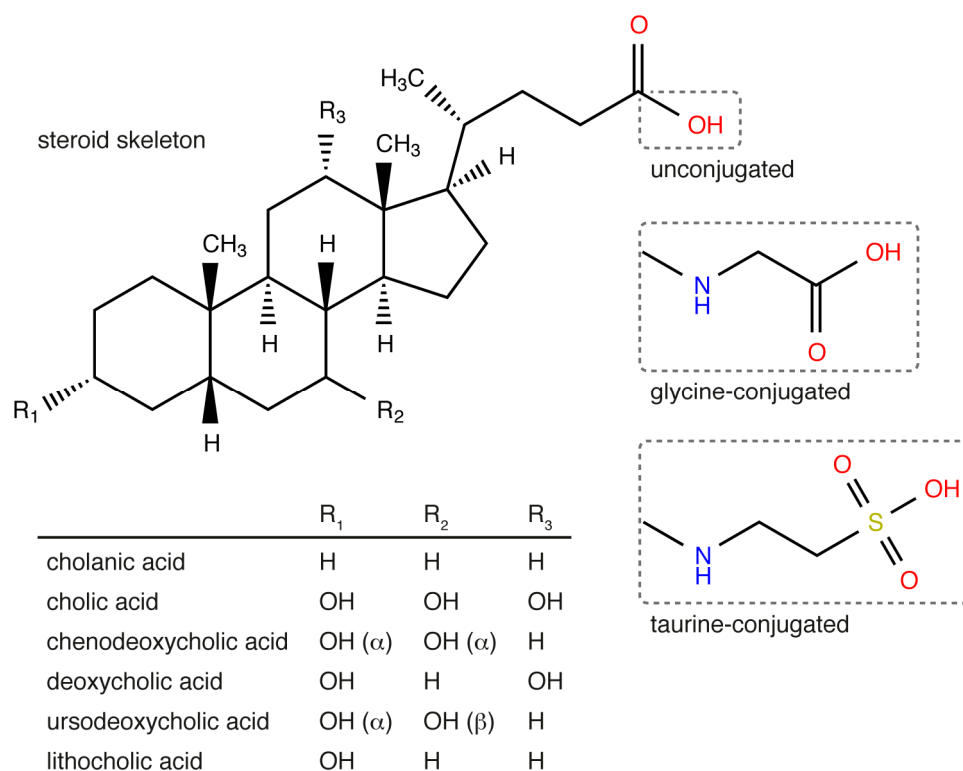

**Figure S1.** Chemical structures of the most abundant bile acids in humans. Modified from [14], with corrections.

|                    |      |                                              |      |
|--------------------|------|----------------------------------------------|------|
| LmGbuA             | 1    | MSKIKVEELTKIFGKKASKASSLLSQGKSKTDILKETG-ATIGV | 60   |
| LmOpuCA            | 1    | --MLKFEHVTK-----TYKGG-K-KAVNDTLNIDKGEFFVCI   | 35   |
| BIEA               | 1    | --MIRFDNVSK-----KYSD-D-KTAAVNVTLIDKGEFFVFI   | 36   |
| Ybt1_yeast_NBD1    | 694  | ---FAFENSTI-----SWDKDNQDFKIDNIEFKTGKLNVI     | 729  |
| Ybt1_yeast_NBD2    | 1381 | ---TEVNDLSL-----RYAPNL-PRVIKNVSFVDAQSKI      | 1415 |
| ABCB11_mouse_NBD2  | 1078 | ---IDFIDCKF-----TYPSPRDIQVLNGLSVSDPGOTLAFV   | 1113 |
| ABCB11_rat_NBD2    | 1078 | ---IDFIDCKF-----TYPSPRDIQVLNGLSVSVNPGOTLAFV  | 1113 |
| ABCB11_human_NBD2  | 1078 | ---IDFVDCKF-----TYPSPRDSQVLNGLSVSISPGOTLAFV  | 1113 |
| ABCB11_rabbit_NBD2 | 1078 | ---IDFVDCKF-----TYPSPRDIQVLNGLSVSMSRQTLAFV   | 1113 |
| ABCB11_rabbit_NBD1 | 420  | ---TEFHNVTF-----HYPSRPEVKILNLSMVIKPGEMTALV   | 455  |
| ABCB11_human_NBD1  | 420  | ---TEFHNVTF-----HYPSRPEVKILNLSMVIKPGEMTALV   | 455  |
| ABCB11_mouse_NBD1  | 420  | ---TEFHNVTF-----HYPSRPEVKILNLSMVIKPGETTALV   | 455  |
| ABCB11_rat_NBD1    | 420  | ---TEFHNVTF-----HYPSRPOVKILNLSMVIKPGETTALV   | 455  |
| LmGbuA             | 61   | LSGGGKSTLVRLLNRLIEPTSGKIWLQKELSSLNKELLEVRKSM | 121  |
| LmOpuCA            | 36   | PSGGGKSTLTKMINRLIEPTGKIFINDKIDMAEDPVK----LR  | 92   |
| BIEA               | 37   | PSGGGKSTLTKMINRLIPTTGTIYINEKRISDYDTH----LR   | 93   |
| Ybt1_yeast_NBD1    | 730  | PTSGGKSTLMLALGEMHYLLNGKVVPALEPRQELVD-ANGT    | 788  |
| Ybt1_yeast_NBD2    | 1416 | RTGAGKSTIITALLFRLEPETGHKIDNIDSGVDLQ----LR    | 1471 |
| ABCB11_mouse_NBD2  | 1114 | SSGGGKSTSIQLLRFYDPDQGTVMIDGHDSKKVNVQF----    | 1169 |
| ABCB11_rat_NBD2    | 1114 | SSGGGKSTSIQLLRFYDPDQGTVMIDGHDSKKVNIQF----    | 1169 |
| ABCB11_human_NBD2  | 1114 | SSGGGKSTSIQLLRFYDPDQGTVMIDGHDSKKVNVQF----    | 1169 |
| ABCB11_rabbit_NBD2 | 1114 | SSGGGKSTSIQLLRFYDPDQGTVMIDGHDSKKVNVQF----    | 1169 |
| ABCB11_rabbit_NBD1 | 456  | PSGAGKSTALQLIHRFYGPTEGMVTVESHDIRSSHTQW----   | 511  |
| ABCB11_human_NBD1  | 456  | PSGAGKSTALQLIHRFYDPCEGMVTVDGHDIRSLNIQW----   | 511  |
| ABCB11_mouse_NBD1  | 456  | SSGAGKSTALQLIQRFYDPCEGMVTVDGHDIRSLNIQW----   | 511  |
| ABCB11_rat_NBD1    | 456  | SSGAGKSTALQLIQRFYDPCEGMVTVDGHDIRSLNIQW----   | 511  |
| LmGbuA             | 122  | INRNVEYGLIEIQGMDKEER-----EKNAAE-----SLALVGL  | 155  |
| LmOpuCA            | 93   | IRENTVLVPLKLKWKSEKK-----QERAKE-----LKLVDL    | 127  |
| BIEA               | 94   | IENTAIVPELKKWSKEKI-----HDRITE-----LDSVGLDPE  | 129  |
| Ybt1_yeast_NBD1    | 789  | VKNLLFNSPFNEARYKAVVEACGL-----KR-----DIEI     | 826  |
| Ybt1_yeast_NBD2    | 1472 | IKTNLDPYDEFSDRQIFEALKRVNLISEEQQQGATRETSNEAS  | 1530 |
| ABCB11_mouse_NBD2  | 1170 | IMDNIKYGDNTKEISVER-----AIAAAQ-----AQLHDFV    | 1210 |
| ABCB11_rat_NBD2    | 1170 | IMDNIKYGDNTKEISVER-----AIAAAQ-----AQLHDFV    | 1210 |
| ABCB11_human_NBD2  | 1170 | IMDNIKYGDNTKEIPMER-----VIAAAQ-----AQLHDFV    | 1210 |
| ABCB11_rabbit_NBD2 | 1170 | IKDNIKYGDNTKEIPMER-----IIAAAK-----AQVHDFV    | 1210 |
| ABCB11_rabbit_NBD1 | 512  | IAEKIRYGRD--ATMED-----LIQAAE-----ANAYNFI     | 550  |
| ABCB11_human_NBD1  | 512  | IAENIRYGRD--ATMED-----IVQAAE-----ANAYNFI     | 550  |
| ABCB11_mouse_NBD1  | 512  | IAENIRLGRD--ATMED-----IVQAAK-----ANAYNFI     | 550  |
| ABCB11_rat_NBD1    | 512  | IAENIRFGRD--ATMED-----IVQAAK-----ANAYNFI     | 550  |
| LmGbuA             | 156  | YGDQYPSQLSGGQQRVGLARALANNPDILLMDFAFSALDPLNR  | 216  |
| LmOpuCA            | 128  | FLDRYPYELSGGQQRIGVLRALAAEQNLIMDEPFPGALDPITR  | 188  |
| BIEA               | 130  | YRHRKPAELSGGQQRGVVLRALAADPGIILMDPEFSALDPTSR  | 190  |
| Ybt1_yeast_NBD1    | 827  | EIEKIGITLSGGQQRVSLARALYSNARHVLDDCLSAVDSHTA   | 887  |
| Ybt1_yeast_NBD2    | 1531 | EISEGGSNLSGGQQRVLMCLARSLRSPKILLDEATASIDYS    | 1589 |
| ABCB11_mouse_NBD2  | 1211 | NVGISGQSLSRGKQRIATARAIVRDPKILLDEATSALDTESEK  | 1269 |
| ABCB11_rat_NBD2    | 1211 | NVGISGQSLSRGKQRIATARAIVRDPKILLDEATSALDTESEK  | 1269 |
| ABCB11_human_NBD2  | 1211 | NVGISGQSLSRGKQRIATARAIVRDPKILLDEATSALDTESEK  | 1269 |
| ABCB11_rabbit_NBD2 | 1211 | NVGISGQSLSRGKQRIATARAIVRDPKILLDEATSALDTESEK  | 1269 |
| ABCB11_rabbit_NBD1 | 551  | LVGEGGGMGGQQRVAIARALIRNPKILLDMATSALDNESAMV   | 609  |
| ABCB11_human_NBD1  | 551  | LVGEGGGMGGQQRVAIARALIRNPKILLDMATSALDNESAMV   | 609  |
| ABCB11_mouse_NBD1  | 551  | LVGEGGGMGGQQRVAIARALIRKPKILLDMATSALDNESAKV   | 609  |
| ABCB11_rat_NBD1    | 551  | LVGEGGGMGGQQRVAIARALIRNPKILLDMATSALDNESARV   | 609  |
| LmGbuA             | 217  | IIFITHMDAELRIGHIMIRDSVSVQTSPEIILAHPANVEKFI   | 277  |
| LmOpuCA            | 189  | IIFVTHMDAELKADRIVIMKDEIVQFDPDEILRNPAASFVED   | 249  |
| BIEA               | 191  | IIFVTHMQEALALGDRICVMHGGEIVQVAPQIMKNPENDFVK   | 251  |
| Ybt1_yeast_NBD1    | 888  | CLLVSHNIALTLRNAELVLLDGRVKDQDPIDMOK--GLFGE    | 935  |
| Ybt1_yeast_NBD2    | 1590 | ILTIARHLRS-VIDYDKILVMDAGEVKEYDHPYSLLNKQSAF   | 1636 |
| ABCB11_mouse_NBD2  | 1270 | CIIVIAHRLST-IQNSDIHAVMSQGVVIEKGTHEKLM-AQK    | 1316 |
| ABCB11_rat_NBD2    | 1270 | CIIVIAHRLST-IQNSDIHAVMSQGVVIEKGTHEKLM-AQK    | 1316 |
| ABCB11_human_NBD2  | 1270 | CIIVIAHRLST-IQNSDIHAVMSQGVVIEKGTHEELM-AQK    | 1316 |
| ABCB11_rabbit_NBD2 | 1270 | CIIVIAHRLST-IQNSDIHAVMSQGVVIEKGTHEELM-VQK    | 1316 |
| ABCB11_rabbit_NBD1 | 610  | IISVAHRLPAT-IRTAADVIGCEHCAAVRGTEELL-ERKGV    | 656  |
| ABCB11_human_NBD1  | 610  | IISVAHRLST-VRAADTVIGFEHGTAVRGTEELL-ERKGV     | 656  |
| ABCB11_mouse_NBD1  | 610  | IISVAHRLST-VRSADVIGFEHGTAVRGTEELL-ERKGV      | 656  |
| ABCB11_rat_NBD1    | 610  | IISVAHRLST-VRAADTVIGFEHGTAVRGTEELL-ERKGV     | 656  |
| LmGbuA             | 278  | ---VMIRPEIVNFE-KDGPVALKRMREAGTSSVFVKRNREL    | 334  |
| LmOpuCA            | 250  | QVAQIMNTNPVSITADKSLQAATVMKEKRVDTLLVVDG       | 309  |
| BIEA               | 252  | NF-----PTTGL--DTPLAEIMDTI--STTTIPIAVTED      | 253  |
| LmGbuA             | 335  | SLETALHRDV-----PTTGL--DTPLAEIMDTI--STTTI     | 382  |
| LmOpuCA            | 310  | SVMDIEIKNVFYVEDTLL-----RDTVQRILKRGYKIP       | 359  |
| BIEA               | 254  | TVNDLIEADLFYSYQTSDGLTGISSTPEPVNLVRRIA--      | 311  |
| LmGbuA             | 383  | SVLAALSGNEVNV-----NA-----                    | 397  |
| LmOpuCA            | 360  | SLVDIVYDSIWGTLEDATENQEEQADSKTTEPEMKQEG       | 397  |
| BIEA               | 312  | HVMQFLARHLE---SSGELV-----                    | 328  |

**Figure S2.** Multiple sequence alignment of selected NBDs. The sequences included are the same as in Sleator et al. [18], with the addition of proteins from the *L. monocytogenes* Gbu and OpuC systems. UniProt Accession Numbers: LmGbuA, Q7AP76; LmOpuCA, Q7AP65; BIEA, Q7AP69; yeast YBT1, P32386; mouse ABCB11, Q9QY30; rat ABCB11, O70127; human ABCB11, O95342; rabbit ABCB11, Q9N0V3. The eukaryotic proteins have the domain organization TMD1-NBD1-TMD2-NBD2. The two regions corresponding to NBD1 and NBD2 (based on annotation in UniProt) were included as separate sequences in the alignment. Residues are shaded according to percentage sequence identity.

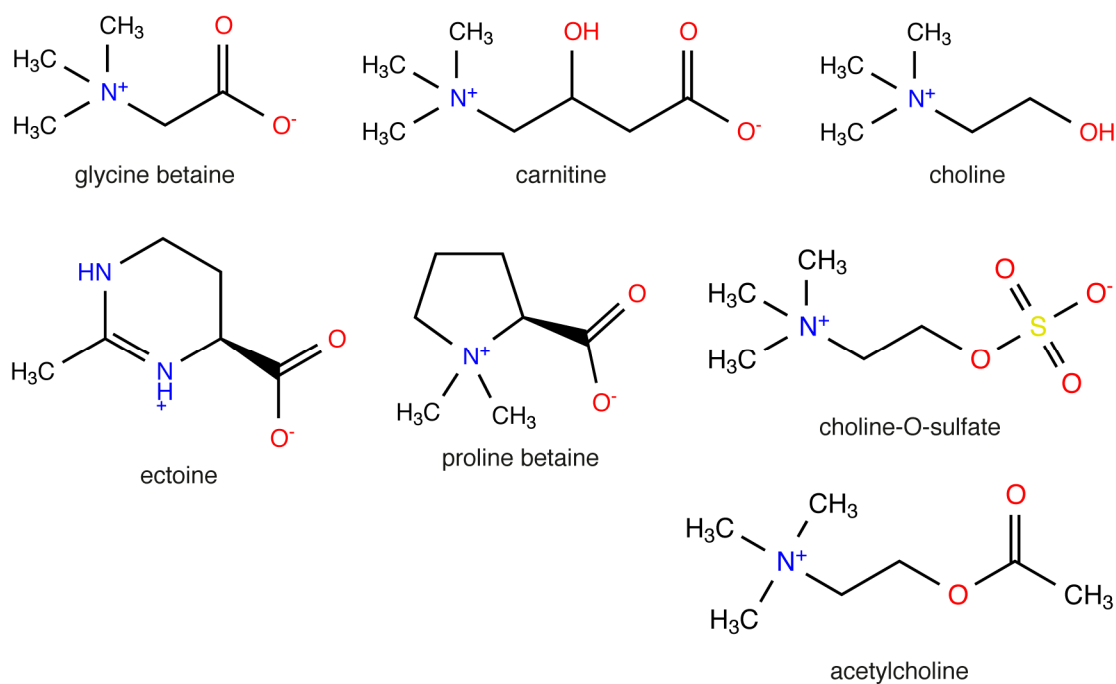

**Figure S3.** Ligands of substrate-binding proteins homologous to BileB<sub>SBD</sub>.

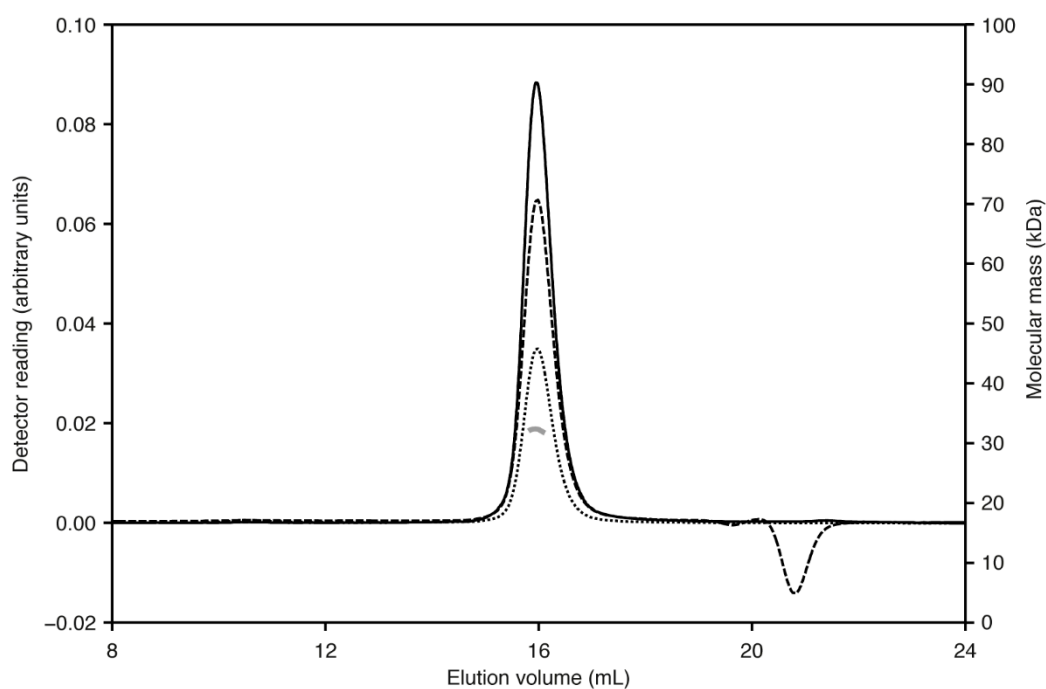

**Figure S4.** Determination of the oligomeric state of BileB<sub>SBD</sub>. A sample of purified protein was passed over a gel filtration column coupled to detectors for absorbance at 280 nm (solid black line), refractive index (dashed line), and static light scattering (dotted line). The solid gray line shows the calculated molecular weight of the eluted protein (32.4 kDa), which closely matches the molecular weight of a BileB<sub>SBD</sub> monomer predicted on the basis of the amino acid sequence (33.4 kDa).

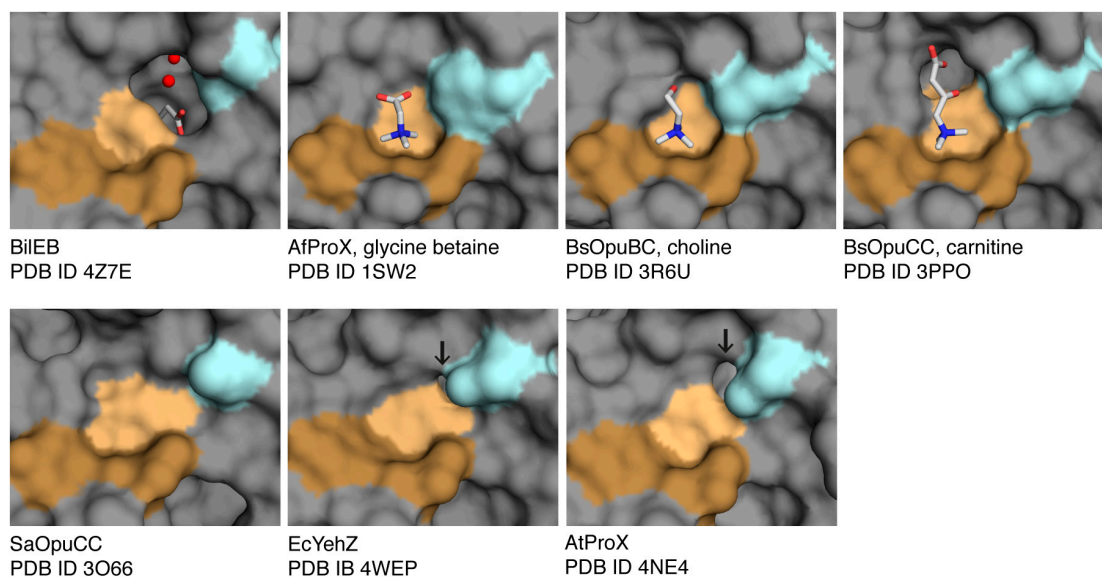

**Figure S5.** The binding site on the face of domain A. Proteins are shown in surface representation with residues of domain B omitted for clarity. Ligands are shown in stick representation with oxygens colored red, nitrogens colored blue and carbons colored white. Water molecules are shown as red spheres. Residues forming a cage around the quaternary ammonium are dark gold except for the position corresponding to Phe<sup>292</sup> of BileB, which is pale gold. Residue at positions corresponding to Gly<sup>243</sup> and Pro<sup>246</sup> of BileB are colored pale blue. Images were prepared in PyMOL [52].
